# Supplementary material for: Whether Primary Bone‐Only Oligometastatic Nasopharyngeal Carcinoma Patients Benefit From Radiotherapy to the Bones on the Basis of Palliative Chemotherapy Plus Locoregional Radiotherapy?—A Large‐Cohort Retrospective Study
Source: PubMed Central journal article supplement (PMC11533001; doi:10.1002/cam4.70315), 2024-11-04

# Comparison of two ROC curves for EBV DNA cutoff

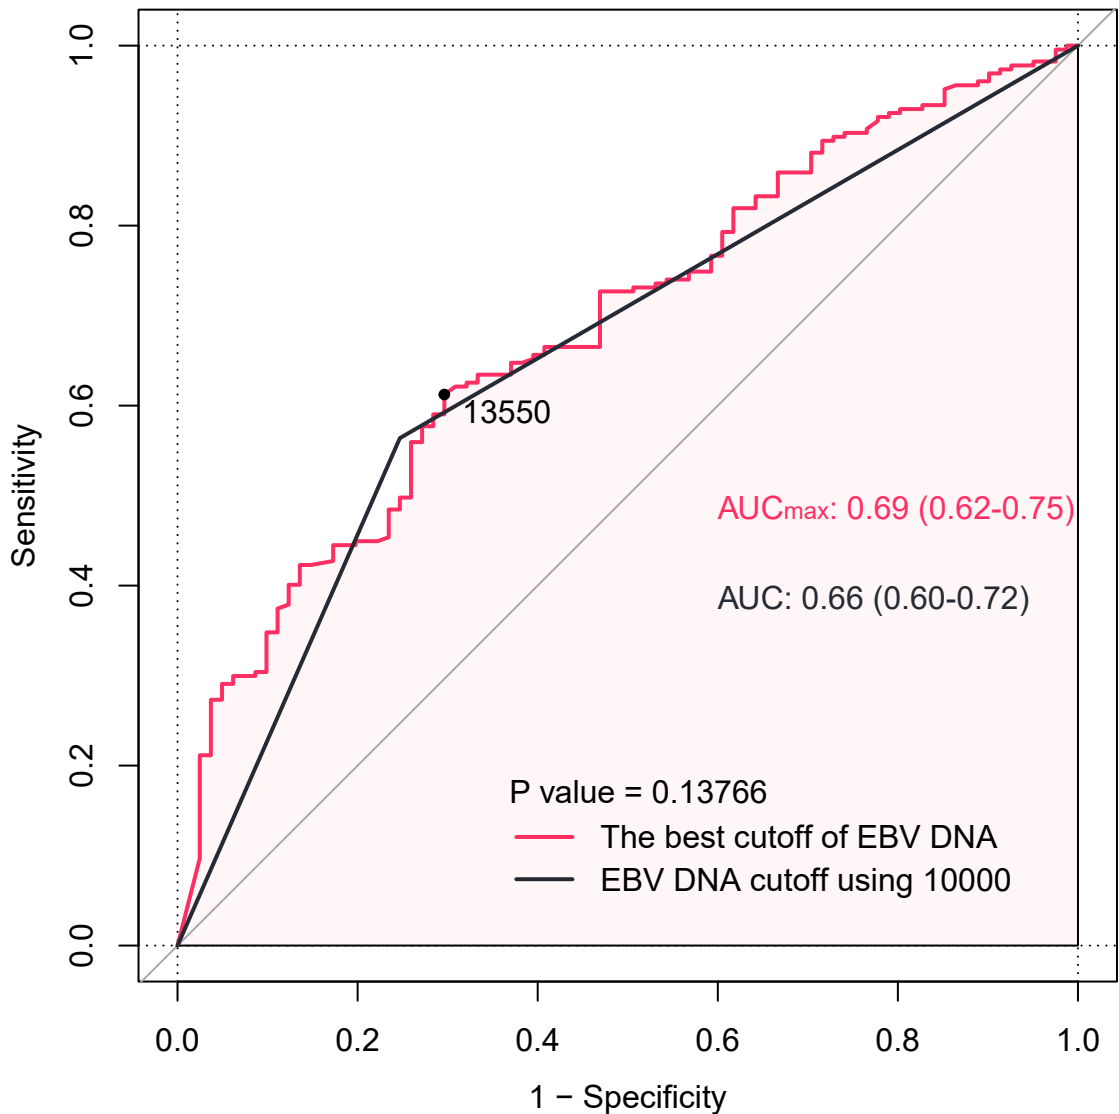

Supplement: CAM4-13-e70315-s001.pdf [file CAM4-13-e70315-s001.pdf]
